# Supplementary material
Source: PubMed Central journal article supplement (PMC6689256)
Supplement: NIHMS1530151-supplement-1.pdf [file NIHMS1530151-supplement-1.pdf]

Supplemental Table 1: Association of Potential Predictors of Delayed Development (Bayley) in ZIKV exposed infants (N=146)

| Predictive factors         | N   | Bayley's Score 1 SD below normal<br>(N=59) vs. Everyone else (N=87) |              |               | Bayley's Score 2 SD below normal<br>(N=18) vs. Everyone else (N=128) |              |         |
|----------------------------|-----|---------------------------------------------------------------------|--------------|---------------|----------------------------------------------------------------------|--------------|---------|
|                            |     | Adjusted Odds Ratio <sup>a</sup>                                    |              |               | Adjusted Odds Ratio <sup>a</sup>                                     |              |         |
|                            |     | OR                                                                  | 95% CI       | p value       | OR                                                                   | 95% CI       | p value |
| Mother's age at birth      | 146 | 0.95                                                                | (0.89, 1.01) | 0.13          | 0.96                                                                 | (0.87, 1.06) | 0.45    |
| Prematurity                |     |                                                                     |              |               |                                                                      |              |         |
| No                         | 127 |                                                                     | 1.00         |               |                                                                      | 1.00         |         |
| Yes                        | 19  | 5.41                                                                | (1.66, 20.6) | <b>0.0076</b> | 3.37                                                                 | (0.77, 13.8) | 0.09    |
| Sex                        |     |                                                                     |              |               |                                                                      |              |         |
| Male                       | 75  |                                                                     | 1.00         |               |                                                                      | 1.00         |         |
| Female                     | 71  | 0.36                                                                | (0.16, 0.78) | <b>0.01</b>   | 0.57                                                                 | (0.17, 1.85) | 0.36    |
| Size for gestational age   |     |                                                                     |              |               |                                                                      |              |         |
| No                         | 93  |                                                                     | 1.00         |               |                                                                      | 1.00         |         |
| Yes                        | 10  | 0.17                                                                | (0.02, 1.01) | 0.08          | 0.75                                                                 | (0.06, 5.21) | 0.79    |
| Missing                    | 43  | 0.59                                                                | (0.13, 2.65) | 0.48          | 0.14                                                                 | (0.01, 1.42) | 0.10    |
| C- section                 |     |                                                                     |              |               |                                                                      |              |         |
| No                         | 31  |                                                                     | 1.00         |               |                                                                      | 1.00         |         |
| Yes                        | 104 | 1.08                                                                | (0.39, 3.10) | 0.89          | 1.28                                                                 | (0.30, 7.02) | 0.75    |
| Missing                    | 11  | 0.77                                                                | (0.09, 5.80) | 0.8           | 1.09                                                                 | (0.02, 22.1) | 0.96    |
| Mother's educational level |     |                                                                     |              |               |                                                                      |              |         |
| Elementary                 | 8   |                                                                     | 1.00         |               |                                                                      | 1.00         |         |
| Secondary                  | 42  | 1.53                                                                | (0.19, 19.2) | 0.71          | 0.48                                                                 | (0.04, 7.89) | 0.57    |
| College                    | 57  | 2.62                                                                | (0.34, 33.6) | 0.39          | 1.00                                                                 | (0.10, 17.6) | 0.99    |
| Missing                    | 39  | 2.66                                                                | (0.24, 43.9) | 0.45          | 3.13                                                                 | (0.16, 79.3) | 0.46    |
| Abnormal hearing           |     |                                                                     |              |               |                                                                      |              |         |
| No                         | 94  |                                                                     | 1.00         |               |                                                                      | 1.00         |         |
| Yes                        | 12  | 2.3                                                                 | (0.47, 12.3) | 0.31          | 3.25                                                                 | (0.48, 20.3) | 0.21    |

|                           |     |       |              |                |      |              |             |
|---------------------------|-----|-------|--------------|----------------|------|--------------|-------------|
| Missing                   | 40  | 0.77  | (0.28, 2.02) | 0.59           | 1.1  | (0.26, 4.29) | 0.89        |
| Abnormal fundoscopic exam |     |       |              |                |      |              |             |
| No                        | 110 |       | 1.00         |                |      | 1.00         |             |
| Yes                       | 9   | 20.35 | (3.02, 412)  | <b>0.00842</b> | 7.92 | (1.24, 48.9) | <b>0.02</b> |
| Missing                   | 27  | 0.69  | (0.22, 2.02) | 0.51           | 1.27 | (0.21, 5.85) | 0.77        |

<sup>a</sup>Odds ratio from multivariate logistic regression, adjusted for prematurity, sex, size for gestational age, c-section, mother's educational level, ZIVK la result in infant, hearing and vision loss

Supplemental Table 2: Association of Gestational Age of Infection (by trimester of pregnancy as a continuous variable) with Clinical Outcomes

|                                        | N   | Fully Adjusted <sup>a</sup> |              |                 |
|----------------------------------------|-----|-----------------------------|--------------|-----------------|
|                                        |     | OR <sup>a</sup>             | 95% CI       | <i>p</i> -value |
| Hearing                                | 114 | 1.07                        | (0.42, 2.73) | 0.89            |
| Below Average Development <sup>b</sup> | 216 | 0.54                        | (0.34, 0.86) | <b>0.01</b>     |
| Fetal Loss <sup>c, d</sup>             | 233 | 0.88                        | (0.79, 0.96) | <b>0.01</b>     |
| Microcephaly <sup>d</sup>              | 216 | 0.78                        | (0.60, 0.92) | <b>0.02</b>     |
| Fundoscopy evaluation                  | 137 | 0.46                        | (0.14, 1.30) | 0.16            |

<sup>a</sup>Odds ratio from multivariate logistic regression, adjusted for mother's age at birth, sex, prematurity, small for gestational age, C- section, and mother's education. Each OR represents the change in risk for each trimester. For instance, for each trimester that ZIKV infection was delayed, risk for below average development decreased by 46% (OR=0.54, adjusted).

<sup>b</sup>Interview or Bayley's, additionally adjusted for hearing abnormality

<sup>c</sup>Only adjusted for mother's age (other variables were not applicable for fetal loss)

<sup>d</sup>No adverse events were reported for these outcomes during the third trimester, so odds ratios are reported by change in risk over time in weeks. For instance, the risk of fetal loss decreased 12% for each week that ZIKV infection was delayed (OR=0.88, adjusted)

<sup>e</sup>Any delayed development refers to below 1 sd in Bayleys, microcephaly, abnormal interview, hearing or visual abnormality
